# Supplementary material for: The first Japanese case of small airway disease in a patient with autosomal dominant cutis laxa harboring frameshift variant in exon 30 of the elastin gene
Source: Research Square preprint supplement (doi:10.21203/rs.3.rs-3957962/v1), 2024-02-28
Supplement: Supplementary file 1 [file 53df7379a90e0f0e48fda397.xlsx]

## Sheet: Sheet1
Age	%VC	FVC	FEV1	%FEV1	RV	FRC	TLC	RV/TLC	%DLco	%Dlco/VA	MMEF	%MMEF	%FEF50%	%FEF75%
36	104.7	3.5	1.22	43.7	1.94	3.2	5.49	35.45	63	58.5	0.25	6.8	7.9	5.7
45	99.7	3.06	0.99	38.5	2.37	3.42	5.53	42.86	76.9	68.7	0.18	5.4	7	4.6
